# Supplementary material for: Anti-Inflammatory and Antioxidant Pyrrolo[3,4-d]pyridazinone Derivatives Interact with DNA and Bind to Plasma Proteins—Spectroscopic and In Silico Studies
Source: MDPI journal article supplement (doi:10.3390/ijms25031784), 2024-02-01
Supplement: s1 [file s1]

## Supplementary materials

### Anti-inflammatory and antioxidant pyrrolo[3,4-d]pyridazinone derivatives interact with DNA and bind to plasma proteins – spectroscopic and In Silico studies

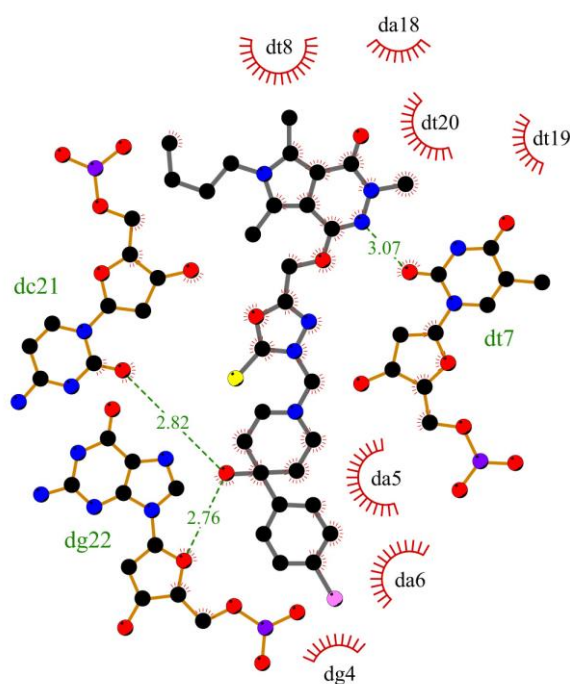

**Figure S1a.** The 2D plot of interactions between molecule 2 and B-DNA.

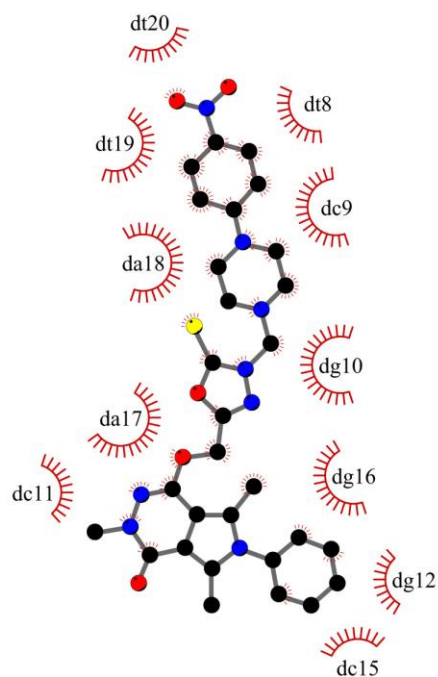

**Figure S1b.** The 2D plot of interactions between molecule 4 and B-DNA.

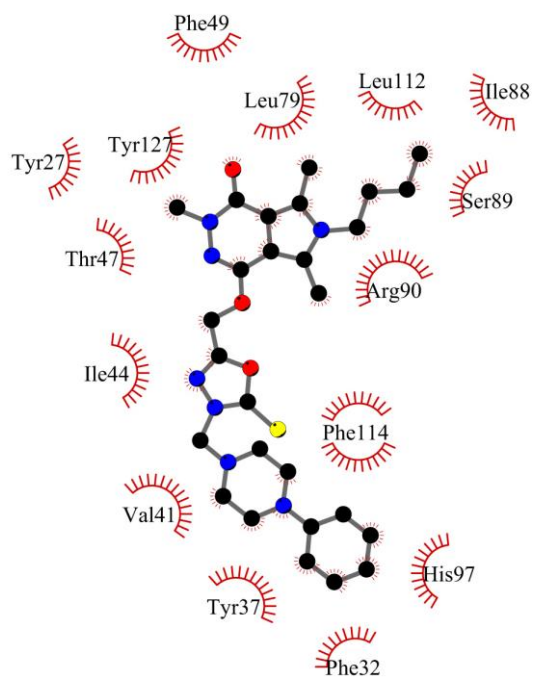

**Figure S2a.** Hydrophobic interactions between compound 1 and  $\alpha$ 1-acid glycoprotein.

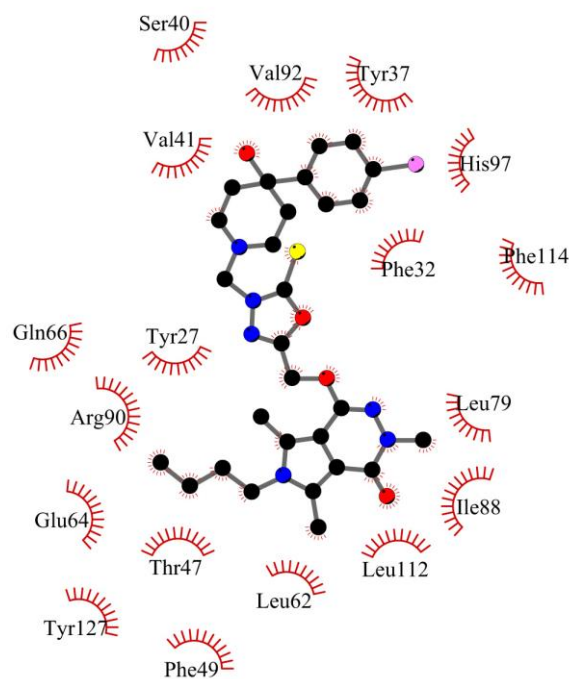

**Figure S2b.** Hydrophobic interactions between compound 2 and  $\alpha$ 1-acid glycoprotein.

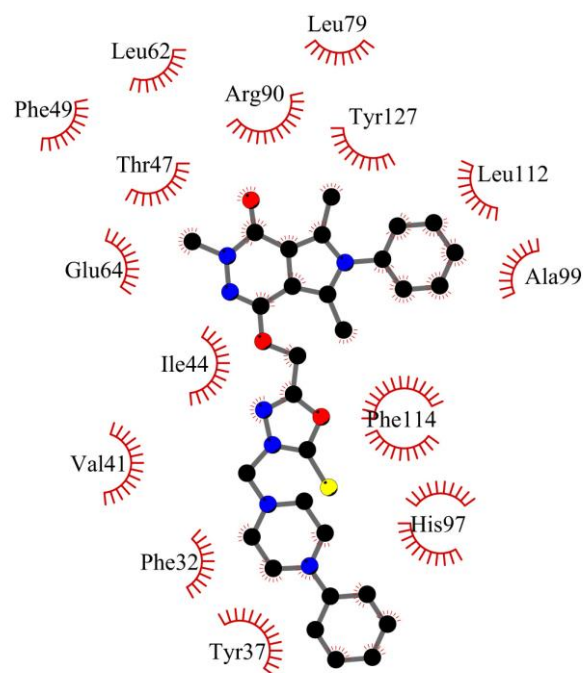

**Figure S2c.** Hydrophobic interactions between compound 3 and  $\alpha$ 1-acid glycoprotein.

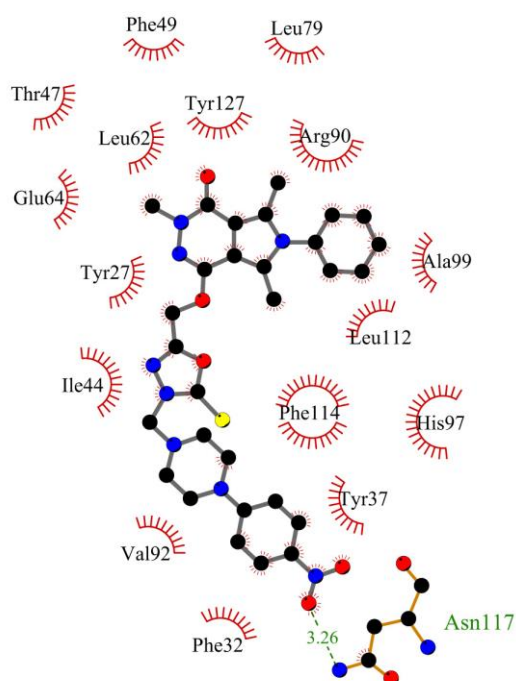

**Figure S2d.** Interactions between compound 4 and  $\alpha$ 1-acid glycoprotein.

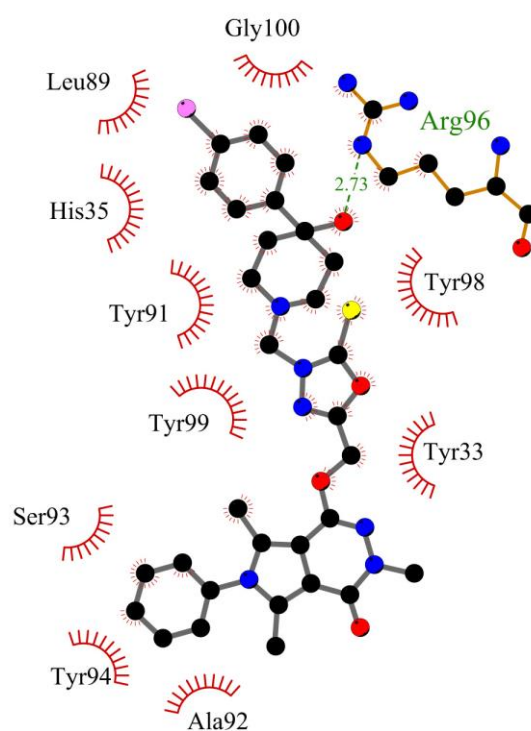

**Figure S3a.** Interactions between compound 1 and gamma globulin.

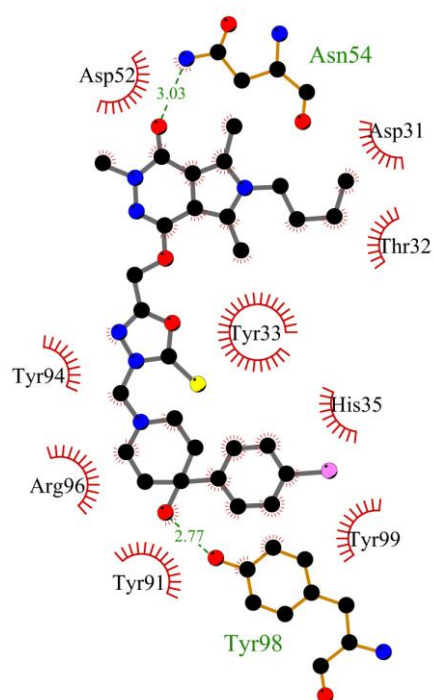

**Figure S3b.** Interactions between compound 2 and gamma globulin.

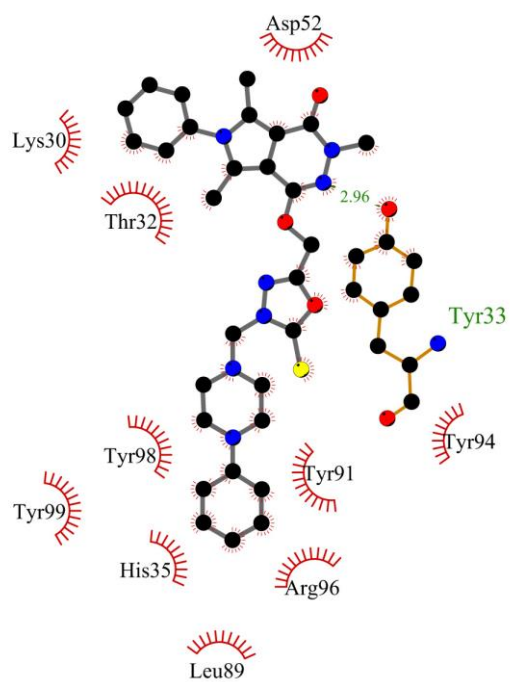

**Figure S3c.** Interactions between compound 3 and gamma globulin.

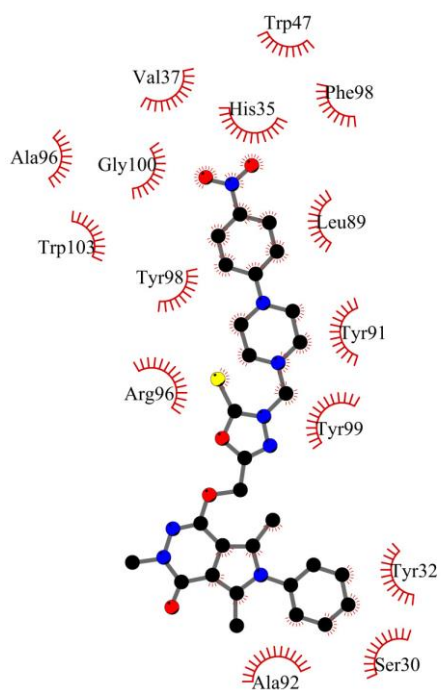

**Figure S3d.** Interactions between compound 4 and gamma globulin.

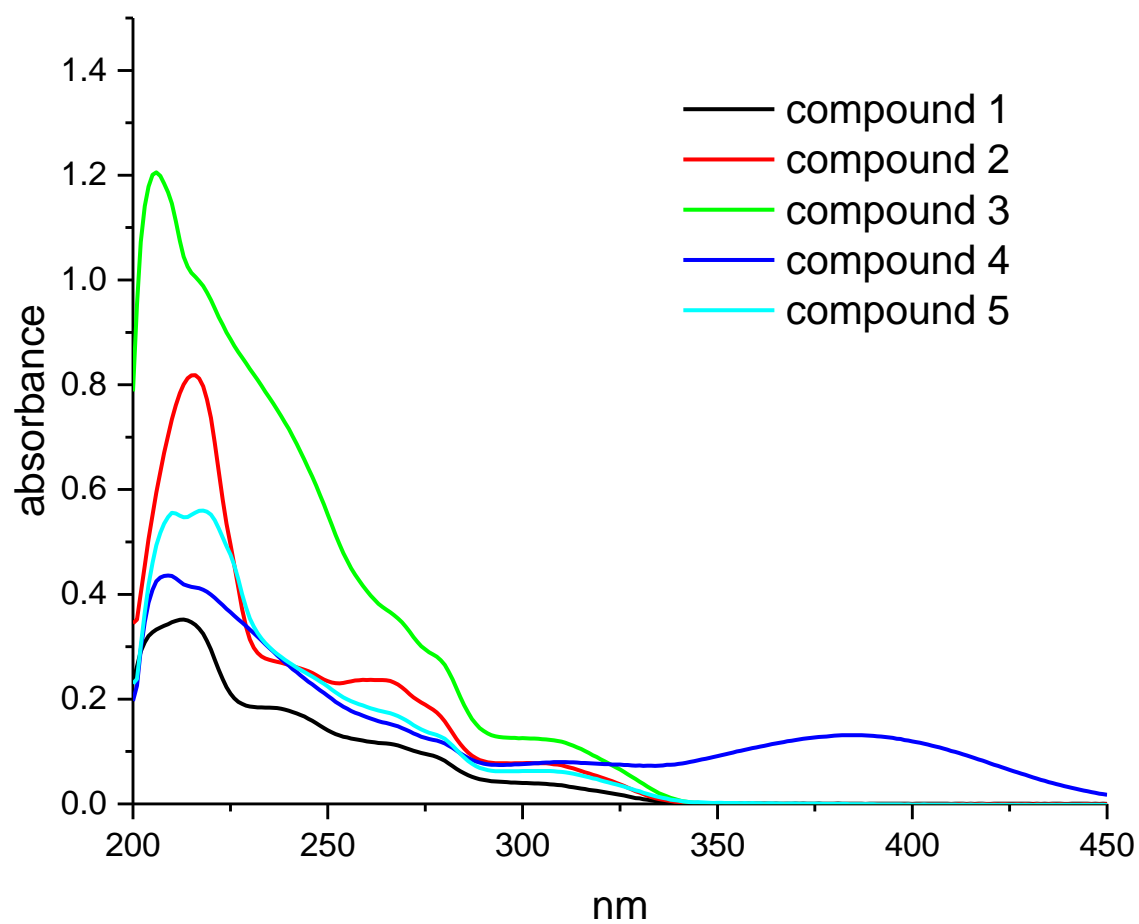

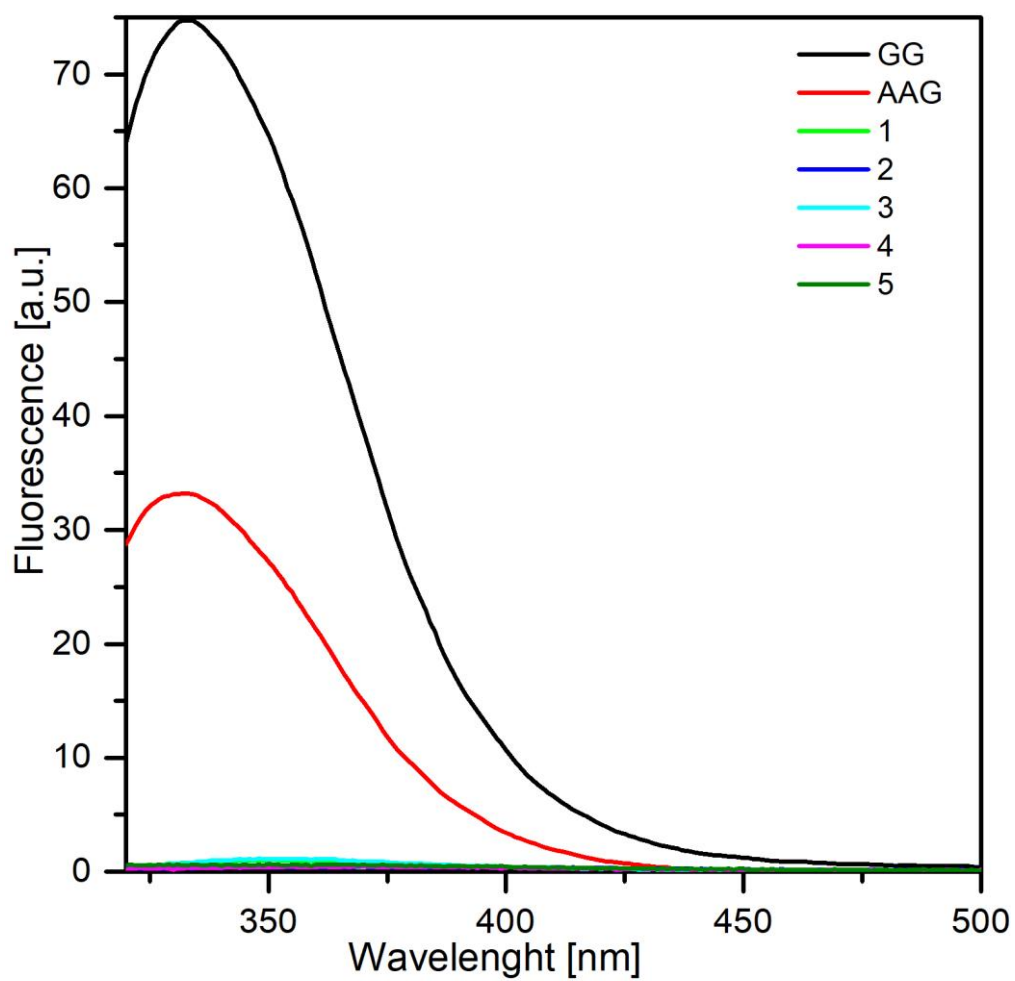

**Figure S4.** UV-Vis and fluorescence spectra of compounds 1-5. The concentration of compounds was  $1 \cdot 10^{-5}$  M and  $1 \cdot 10^{-6}$  M for UV-Vis and fluorescence spectroscopy, respectively. The path length in both methods was equal to 10 mm.
